# Supplementary material for: Underestimation of global O 2 loss in optimally interpolated historical ocean observations
Source: Copernicus journal article supplement (doi:10.5194/bg-2023-72), 2023-05-03
Supplement: Supplementary file 1 [file bg-2023-72-supplement.pdf]

# Supplementary figures for “Underestimation of global O<sub>2</sub> loss in optimally interpolated historical ocean observations”

5 Takamitsu Ito<sup>1</sup>, Hernan E. Garcia<sup>2</sup>, Zhankun Wang<sup>2</sup>, Shoshiro Minobe<sup>3,4</sup>, Matthew C. Long<sup>5</sup>, Just Cebrian<sup>2,6</sup>, James Reagan<sup>2</sup>, Tim Boyer<sup>2</sup>, Christopher Paver<sup>2</sup>, Courtney Bouchard<sup>2</sup>, Yohei Takano<sup>7</sup>, Seth Bushinsky<sup>8</sup>, Ahron Cervania<sup>1</sup>, Curtis A. Deutsch<sup>9</sup>

<sup>1</sup>School of Earth and Atmospheric Sciences, Georgia Institute of Technology, Atlanta, Georgia USA

<sup>2</sup>NOAA, National Centers for Environmental Information, Silver Springs, Maryland, USA

10 <sup>3</sup>Department of Natural History Sciences, Graduate School of Science, Hokkaido University, Sapporo, Japan

<sup>4</sup>Department of Earth and Planetary Sciences, Faculty of Science, Hokkaido University, Sapporo, Japan

<sup>5</sup>Climate and Global Dynamics, National Center for Atmospheric Research, Boulder, Colorado, USA

<sup>6</sup>Northern Gulf Institute, Mississippi State University, Stennis Space Center, Mississippi, USA

<sup>7</sup>Los Alamos National Laboratory, Los Alamos, New Mexico, USA

15 <sup>8</sup>School of Ocean and Earth Science and Technology, University of Hawaii at Manoa, Honolulu, Hawaii, USA

<sup>9</sup>Department of Geosciences, Princeton University, Princeton, NJ, USA

*Correspondence to:* Taka Ito (taka.ito@eas.gatech.edu)

## Supplementary Figures

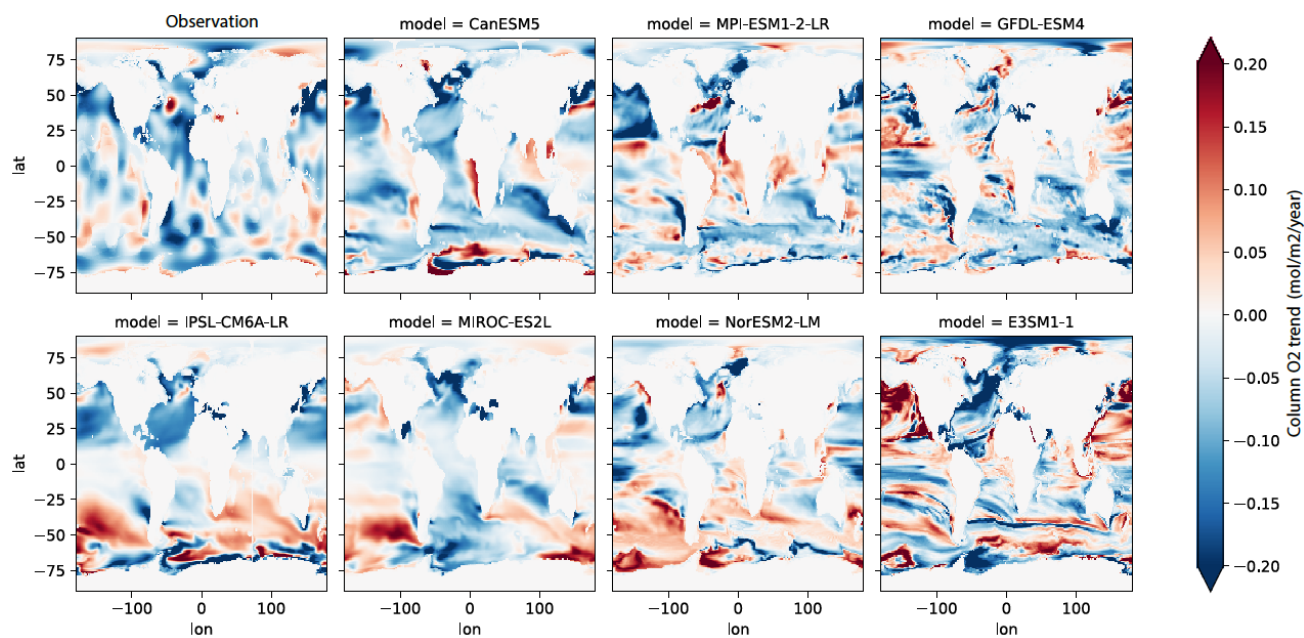

20

**Supplementary Figure S1.** Upper ocean (0-1,000m) column O<sub>2</sub> trend from 1967 to 2012. From upper left to lower right panel, observation (World Ocean Database 2018), CanESM5, MPI-ESM1-2-LR, GFDL-ESM4, IPSL-CM6A-LR, MIROC-ES2L, NorESM2-LM, and E3SM1-1. The full model output is used to calculate the model-derived O<sub>2</sub> trend.

25

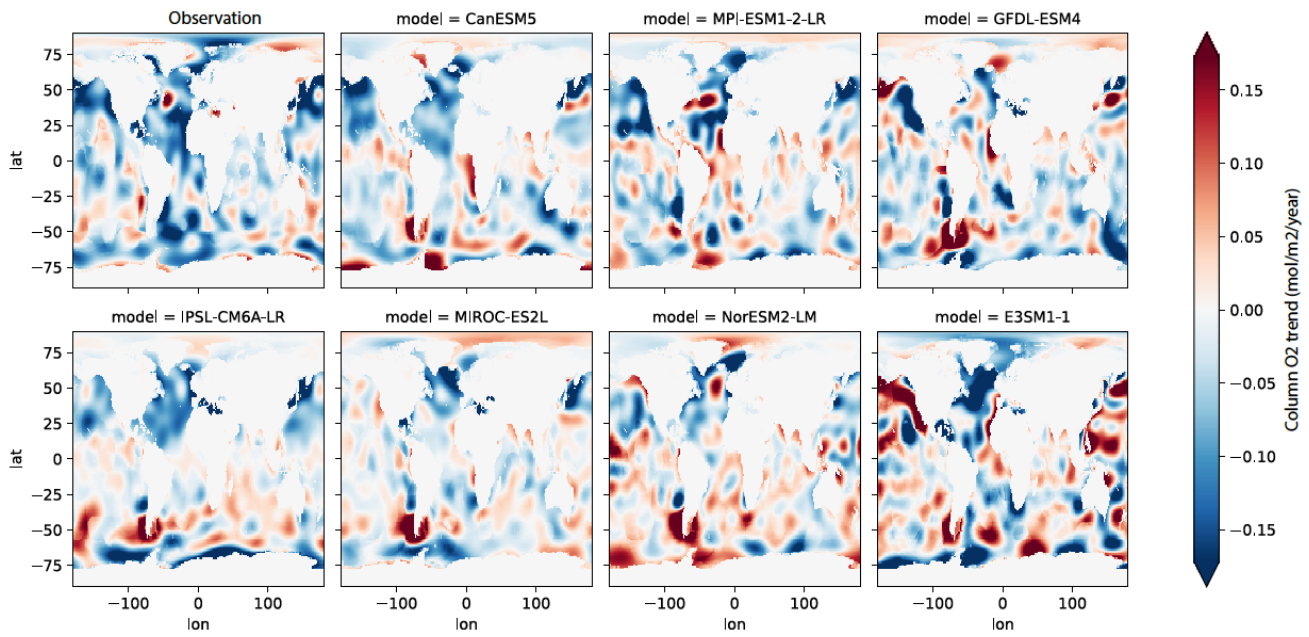

**Figure S2.** Upper ocean (0-1,000m) column O<sub>2</sub> trend from 1967 to 2012. From upper left to lower right panel, observation (World Ocean Database 2018), CanESM5, MPI-ESM1-2-LR, GFDL-ESM4, IPSL-CM6A-LR, MIROC-ES2L, NorESM2-LM, and E3SM1-1. The sub-sampled and optimally interpolated model output is used to calculate the model-derived O<sub>2</sub> trend.

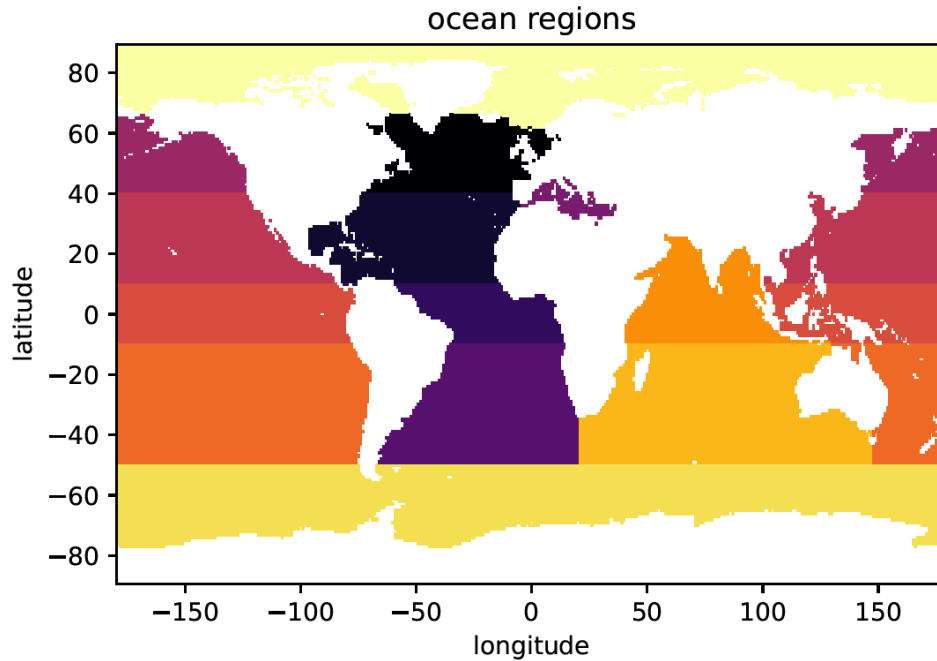

35 **Figure S3.** Ocean regions used in the inventory calculations. The global ocean is divided into 13 regions including [1] Subpolar North Atlantic (SPNA), [2] Subtropical North Atlantic (STNA), [3] Equatorial Atlantic (EQAT), [4] Subtropical South Atlantic (STSA), [5] Mediterranean Sea (MED), [6] Subpolar North Pacific (SPNP), [7] Subtropical North Pacific (STNP), [8] Equatorial Pacific (EQPA), [9] Subtropical South Pacific (STSP), [10] Equatorial Indian Ocean (EQID), [11] Subtropical South Indian Ocean (STSI), [12] Southern Ocean (SO), [13] Arctic Ocean (AO).

40

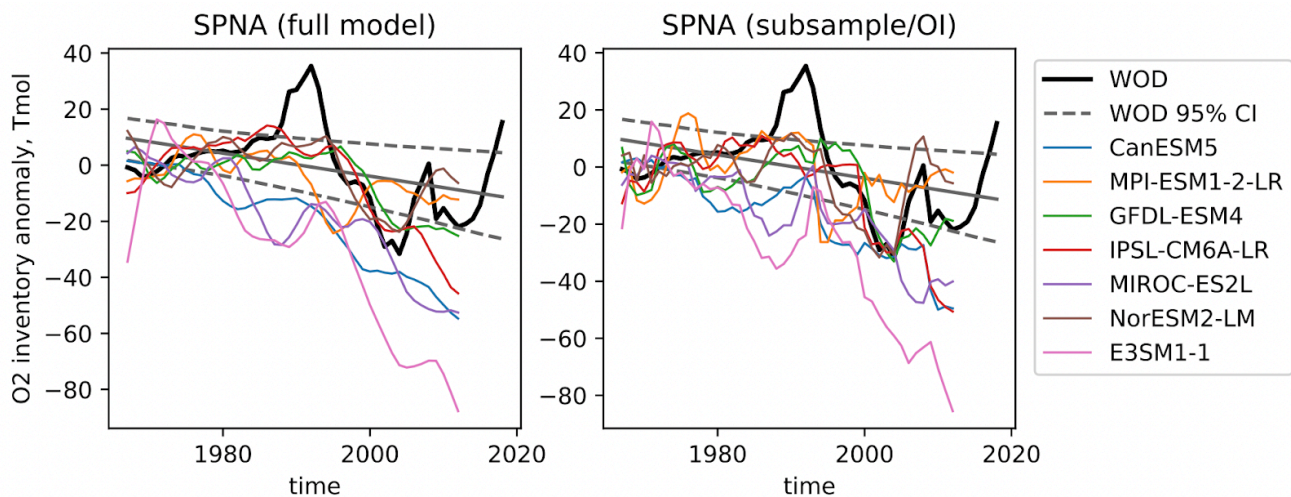

**Figure S4.** Time series of Subpolar North Atlantic (SPNA) upper ocean (0-1,000m) column O<sub>2</sub> inventory from World Ocean Database 2018 (black solid) and CMIP6 models (color) from (left) full model output and (right) subsampled and optimally interpolated model output.

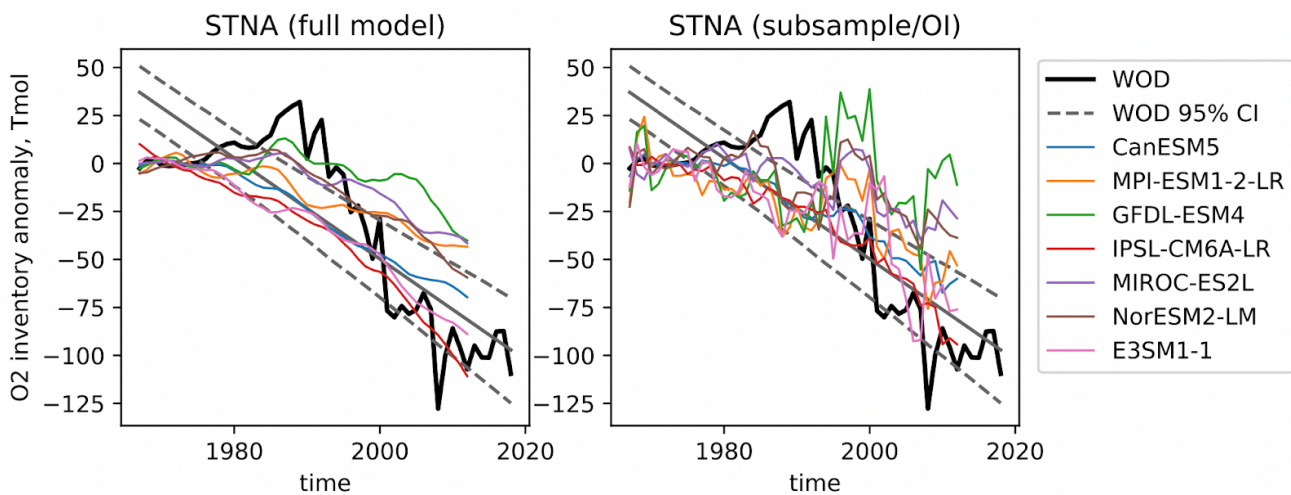

**Figure S5.** Time series of Subtropical North Atlantic (STNA) upper ocean (0-1,000m) column O<sub>2</sub> inventory from World Ocean Database 2018 (black solid) and CMIP6 models (color) from (left) full model output and (right) subsampled and optimally interpolated model output.

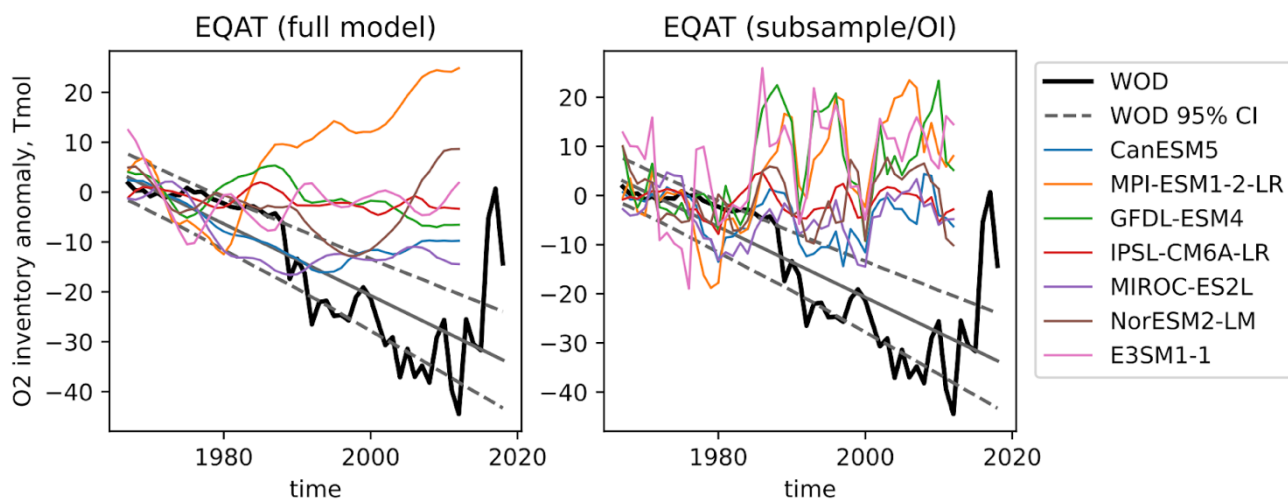

**Figure S6.** Time series of Equatorial Atlantic (EQAT) upper ocean (0-1,000m) column  $O_2$  inventory from World Ocean Database 2018 (black solid) and CMIP6 models (color) from (left) full model output and (right) subsampled and optimally interpolated model output.

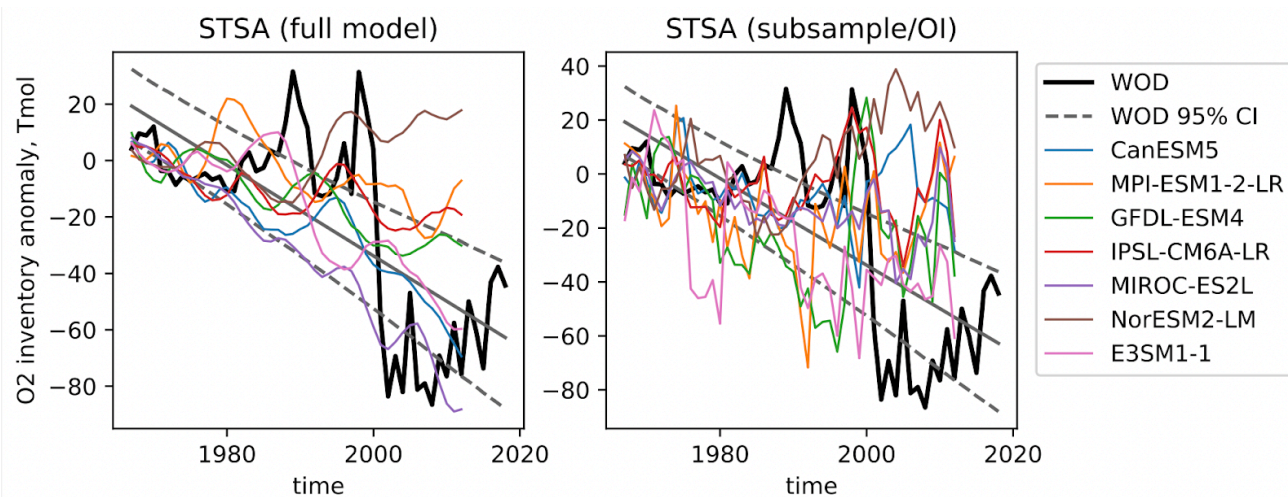

**Figure S7.** Time series of Subtropical South Atlantic (STSA) upper ocean (0-1,000m) column  $O_2$  inventory from World Ocean Database 2018 (black solid) and CMIP6 models (color) from (left) full model output and (right) subsampled and optimally interpolated model output.

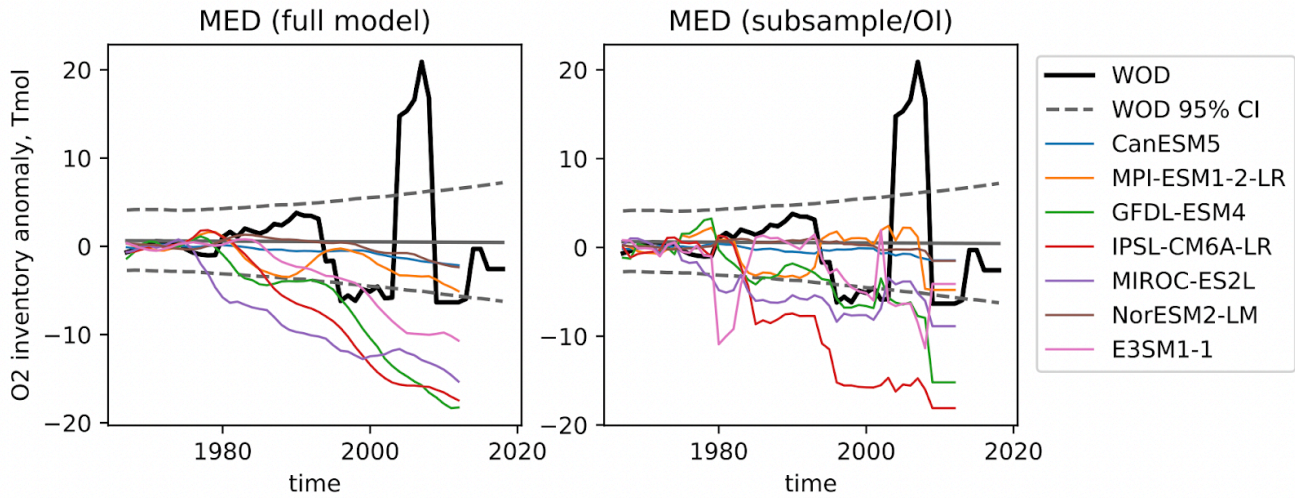

70

**Figure S8.** Time series of Mediterranean (MED) upper ocean (0-1,000m) column  $O_2$  inventory from World Ocean Database 2018 (black solid) and CMIP6 models (color) from (left) full model output and (right) subsampled and optimally interpolated model output.

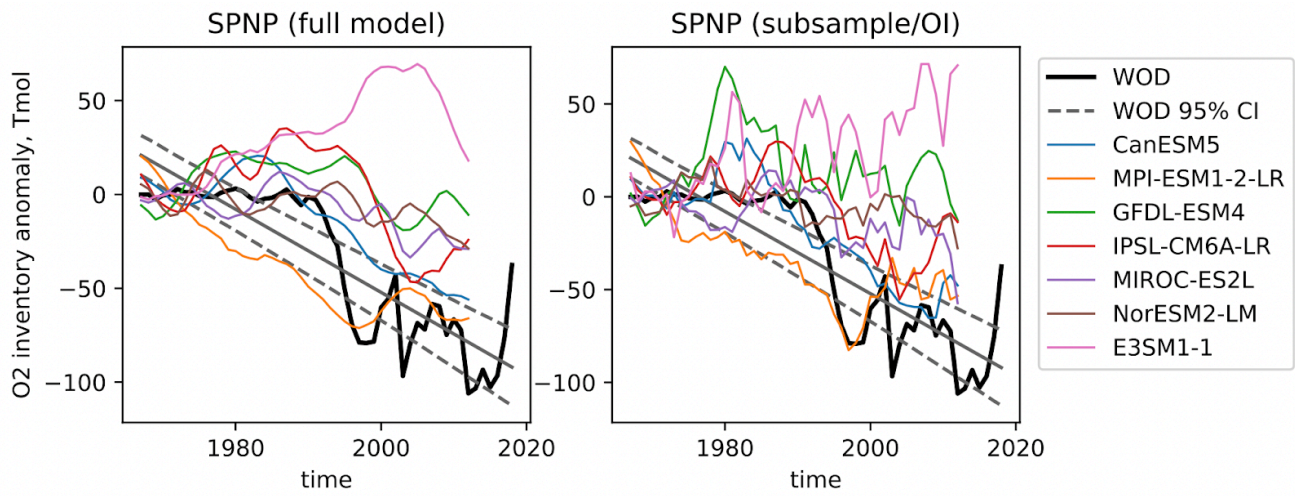

75

**Figure S9.** Time series of Subpolar North Pacific (SPNP) upper ocean (0-1,000m) column  $O_2$  inventory from World Ocean Database 2018 (black solid) and CMIP6 models (color) from (left) full model output and (right) subsampled and optimally interpolated model output.

80

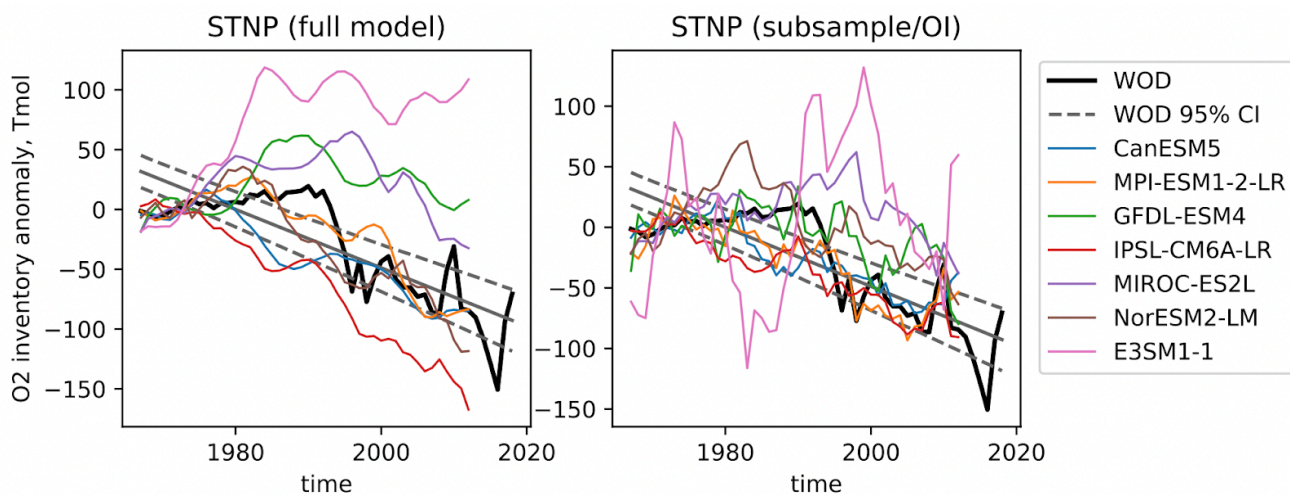

85 **Figure S10.** Time series of Subtropical North Pacific (STNP) upper ocean (0-1,000m) column O<sub>2</sub> inventory from World Ocean Database 2018 (black solid) and CMIP6 models (color) from (left) full model output and (right) subsampled and optimally interpolated model output.

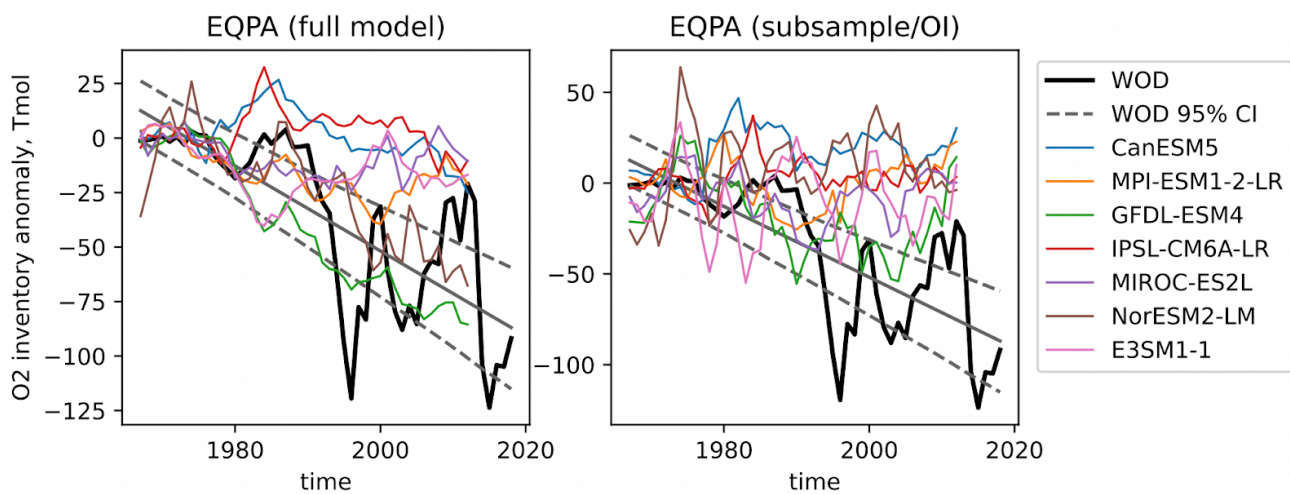

90 **Figure S11.** Time series of Equatorial Pacific (EQPA) upper ocean (0-1,000m) column O<sub>2</sub> inventory from World Ocean Database 2018 (black solid) and CMIP6 models (color) from (left) full model output and (right) subsampled and optimally interpolated model output.



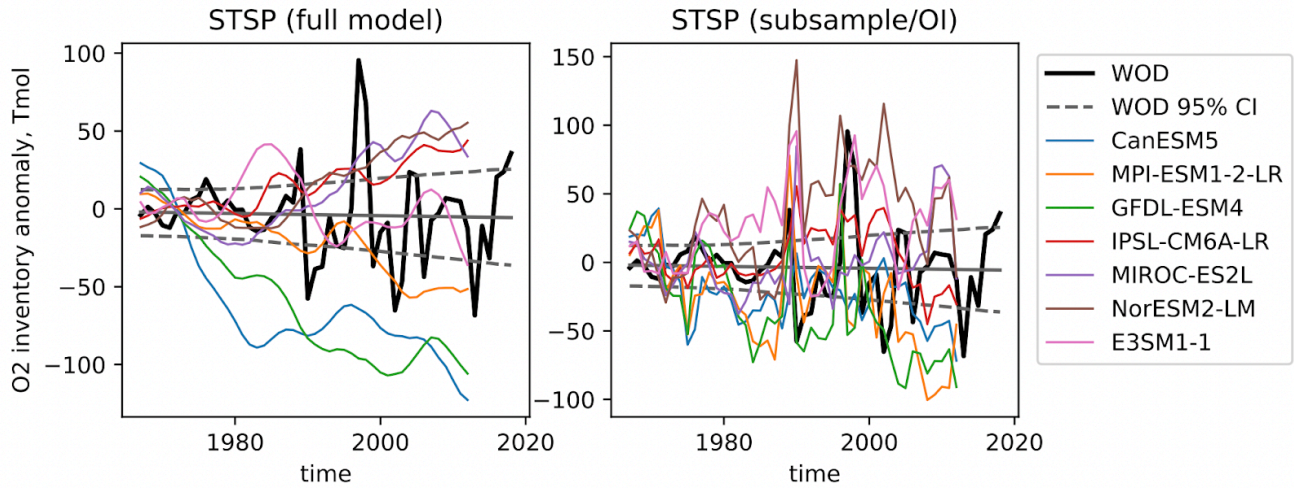

**Figure S12.** Time series of Subtropical South Pacific (STSP) upper ocean (0-1,000m) column  $O_2$  inventory from World Ocean Database 2018 (black solid) and CMIP6 models (color) from (left) full model output and (right) subsampled and optimally interpolated model output.

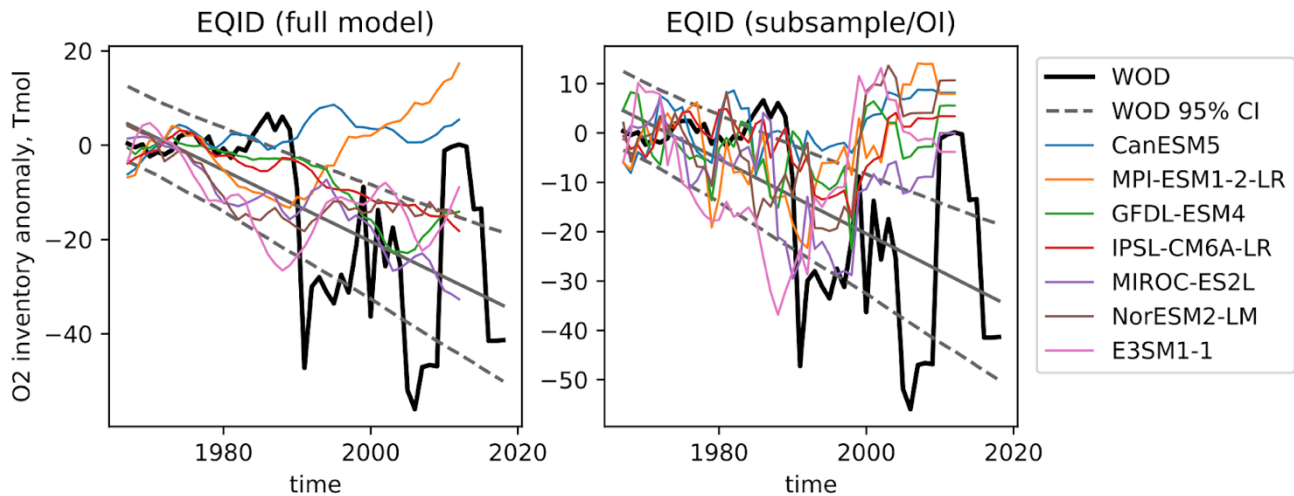

**Figure S13.** Time series of Equatorial Indian (EQID) upper ocean (0-1,000m) column  $O_2$  inventory from World Ocean Database 2018 (black solid) and CMIP6 models (color) from (left) full model output and (right) subsampled and optimally interpolated model output.

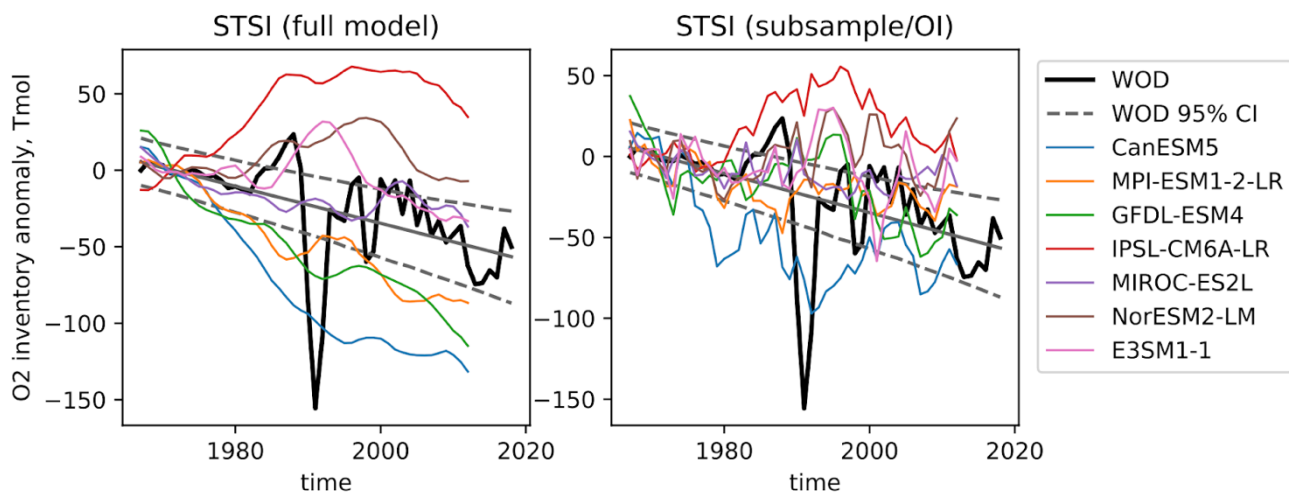

110

**Figure S14.** Time series of Subtropical South Indian (STSI) upper ocean (0-1,000m) column O<sub>2</sub> inventory from World Ocean Database 2018 (black solid) and CMIP6 models (color) from (left) full model output and (right) subsampled and optimally interpolated model output.

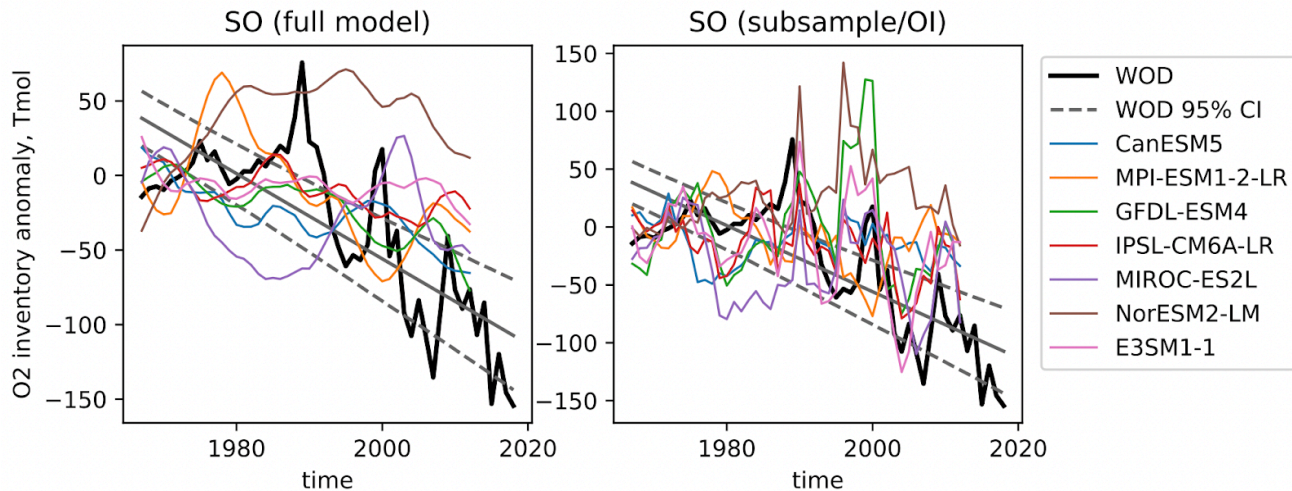

115

**Figure S15.** Time series of Southern Ocean (SO) upper ocean (0-1,000m) column O<sub>2</sub> inventory from World Ocean Database 2018 (black solid) and CMIP6 models (color) from (left) full model output and (right) subsampled and optimally interpolated model output.

120

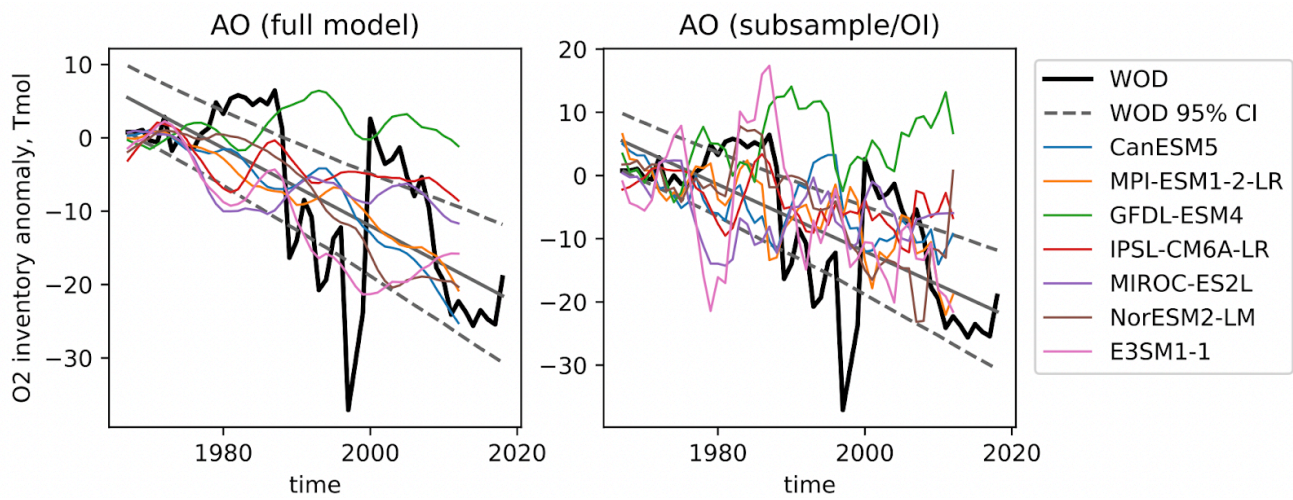

**Figure S16.** Time series of Arctic Ocean (AO) upper ocean (0-1,000m) column O<sub>2</sub> inventory from World Ocean Database 2018 (black solid) and CMIP6 models (color) from (left) full model output and (right) subsampled and optimally interpolated model output.

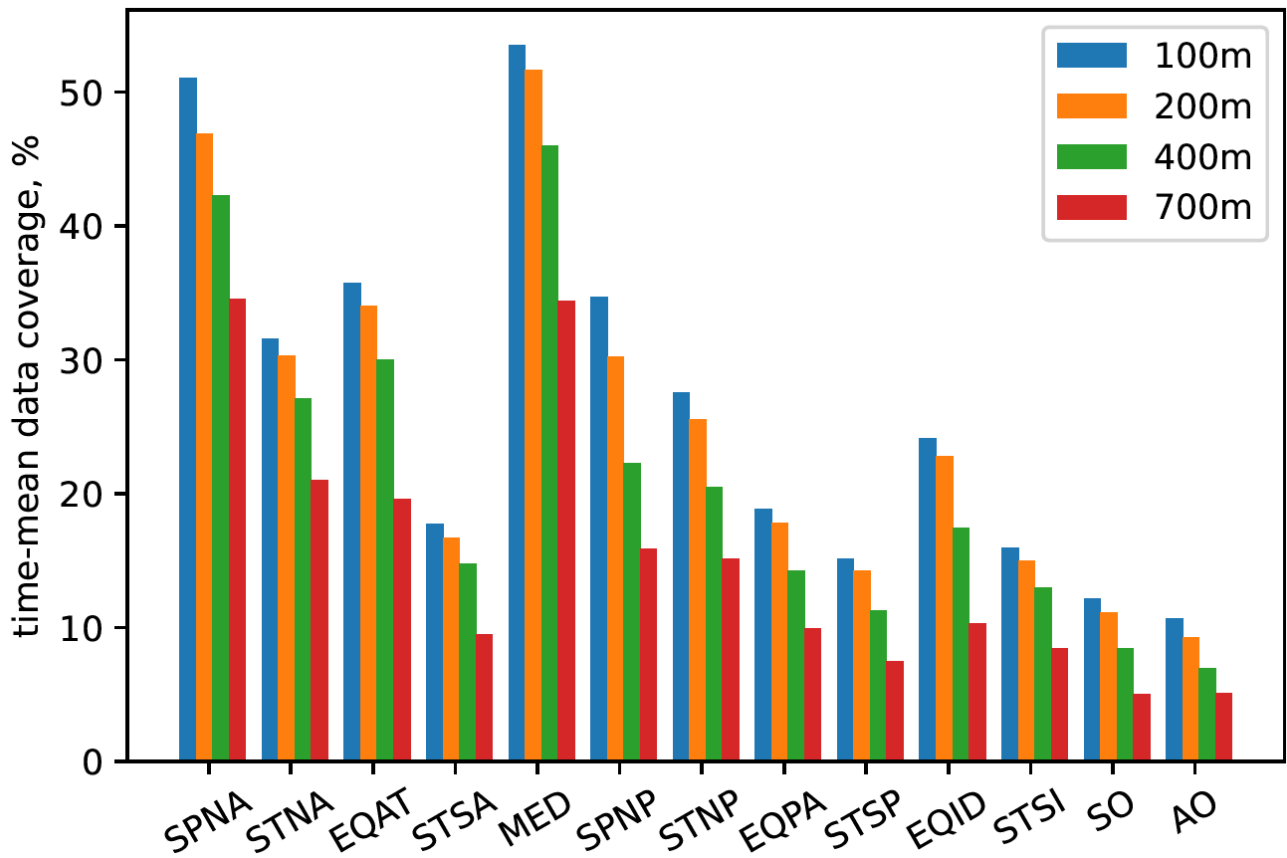

Figure S17. Time-mean data coverage for each basin at the depths of 100, 200, 400 and 700m.
